# Kinetochores protein depletion underlies cytokinesis failure and somatic polyploidization in the moss *Physcomitrella patens*

Elena Kozgunova<sup>1\*</sup>, Momoko Nishina<sup>2</sup>, Gohta Goshima<sup>2\*</sup>

<sup>1</sup>International Collaborative Programme in Science, Graduate School of Science, Nagoya University, Furo-cho, Chikusa-ku, Nagoya, Aichi 464-8602, Japan

<sup>2</sup>Division of Biological Science, Graduate School of Science, Nagoya University, Furo-cho, Chikusa-ku, Nagoya, Aichi 464-8602, Japan

\*Correspondence should be addressed to [kozgunova@gmail.com](mailto:kozgunova@gmail.com); [goshima@bio.nagoya-u.ac.jp](mailto:goshima@bio.nagoya-u.ac.jp)

Phone: +81 52-788-6175; Fax: +81 52-788-6174

## Abstract

Lagging chromosome is a hallmark of aneuploidy arising from errors in the kinetochore–spindle attachment in animal cells. However, kinetochore components and cellular phenotypes associated with kinetochore dysfunction are much less explored in plants. Here, we carried out a comprehensive characterization of conserved kinetochore components in the moss *Physcomitrella patens* and uncovered a distinct scenario in plant cells regarding both the localization and cellular impact of the kinetochore proteins. Most surprisingly, knock-down of several kinetochore proteins led to polyploidy, not aneuploidy, through cytokinesis failure in >90% of the cells that exhibited lagging chromosomes for several minutes or longer. The resultant cells, containing two or more nuclei, proceeded to the next cell cycle and eventually developed into polyploid plants. As lagging chromosomes have been observed in various plant species in the wild, our observation raised a possibility that they could be one of the natural pathways to polyploidy in plants.

## Introduction

The kinetochore is a macromolecular complex that connects chromosomes to spindle microtubules and plays a central role in chromosome segregation. Kinetochore malfunction causes checkpoint-dependent mitotic arrest, apoptosis, and/or aneuploidy-inducing chromosome missegregation (1). Most of our knowledge on kinetochore function and impact on genome stability is derived from animal and yeast studies (2). Another major group of eukaryotes, plants, also possesses conserved kinetochore proteins (3–5). Although the localization and loss-of-function phenotype of some plant kinetochore proteins have been reported before (6–15), the data are mostly obtained from fixed cells of specific tissues. No comprehensive picture of plant kinetochore protein dynamics and functions can be drawn as of yet. For example, 12 out of 16 components that form CCAN (constitutive centromere associated network) in animal and yeast cells cannot be identified by homology searches (2, 5). How the residual four putative CCAN subunits act in plants is also unknown.

The moss *Physcomitrella patens* is an emerging model system for plant cell biology. The majority of its tissues are in a haploid state, and, owing to an extremely high rate of

1 homologous recombination, gene disruption and fluorescent protein tagging of endogenous  
2 genes are easy to obtain in the first generation (16). The homology search indicated that all  
3 the *P. patens* proteins identified as the homologue of human kinetochore components are  
4 conserved in the most popular model plant species *A. thaliana* (5); therefore, the knowledge  
5 gained in *P. patens* would be largely applicable to flowering plants, including crop species.  
6 Another remarkable feature of *P. patens* is its regeneration ability; for example, differentiated  
7 gametophore leaf cells, when excised, are efficiently reprogrammed to become stem cells  
8 (17, 18). Thus, genome alteration even in a somatic cell can potentially spread through the  
9 population.

10 In this study, we aimed to comprehensively characterize conserved kinetochore proteins in a  
11 single cell type, the *P. patens* caulonemal apical cell. We observed that many proteins  
12 displayed localization patterns distinct from their animal counterparts. Furthermore,  
13 kinetochore malfunction led to chromosome missegregation and microtubule disorganization  
14 in the phragmoplast, eventually resulting in cytokinesis failure and polyploidy.

## 15 16 **Results**

### 17 **Endogenous localization analysis of conserved kinetochore proteins in *P. patens***

18 To observe the endogenous localization of putative kinetochore components, we inserted a  
19 fluorescent tag in-frame at the N- and/or C-terminus of eighteen selected proteins, which  
20 contain at least one subunit per sub-complex (Figure 1–Figure supplement 1). Initially we  
21 conducted C-terminal tagging since the success rate of homologous recombination is much  
22 higher than N-terminal tagging (19). For ten proteins, function was unlikely perturbed by  
23 tagging, as the transgenic moss grew indistinguishably from wild-type, despite the single-  
24 copy protein being replaced with the tagged protein. For other seven proteins, the  
25 functionality of the tagged version could not be verified, since untagged paralogs are present  
26 in the genome. The C-terminal tagging line for CENP-S could not be obtained after two  
27 attempts, suggesting that tagging affected the protein’s function and thereby moss viability.  
28 The N-termini of CENP-S, CENP-O, and CENP-C were also tagged with Citrine. Among  
29 them, no paralogous proteins could be identified for CENP-S or CENP-C; therefore, Citrine  
30 signals would precisely represent the endogenous localization. Exceptionally, histone H3-like  
31 CENP-A (CenH3) localization was determined by ectopic Citrine-CENP-A expression, as  
32 tagging likely perturbs its function.

33 Consistent with their sequence homology, many of the proteins were localized to the  
34 kinetochore at least transiently during the cell cycle. However, multiple proteins also showed  
35 unexpected localization (or disappearance) at certain cell cycle stages (Figure 1–Figure  
36 supplement 2–7; Video 1–4). Most surprising were CCAN protein dynamics: CENP-X,  
37 CENP-O and CENP-S did not show kinetochore enrichment at any stages (Figure 1–Figure  
38 supplement 3; Video 1, 3), whereas CENP-C also dissociated from the kinetochore  
39 transiently in the post-mitotic phase (Figure 1B–Figure supplement 4; Video 2, 3). Thus, we  
40 could not identify any “constitutive” kinetochore proteins other than CENP-A.

### 41 **Kinetochore malfunction causes chromosome missegregation and cytokinesis failure**

42 We failed to obtain knockout lines and/or induce frameshift mutation using CRISPR/Cas9 for  
43 the single-copy kinetochore proteins, except for the spindle checkpoint protein Mad2,  
44 strongly suggesting that they are essential for moss viability. We therefore made conditional  
45 RNAi lines, targeting different proteins from both inner and outer kinetochores (summarized  
46 in Figure supplement 1). In this RNAi system, knockdown of target genes was induced by the

1 addition of  $\beta$ -estradiol to the culture medium 4–6 days prior to live-imaging (20). Since  
2 RNAi sometimes exhibits an off-target effect, we prepared two independent RNAi constructs  
3 for most target genes. Following the previously established protocol (20, 21), we screened for  
4 cell growth/division phenotypes in  $\geq 10$  transgenic lines for each construct by using long-term  
5 ( $>10$  h) fluorescent imaging. We observed mitotic defects in multiple RNAi lines, such as  
6 delay in mitotic progression, chromosome missegregation and/or multi-nuclei; these  
7 phenotypes were never observed in the control line (Figure 2A, B–Video 5). A full list of  
8 targeted genes and brief descriptions of the observed phenotypes are provided in Figure  
9 supplement 1.

10 We first selected CENP-A for detailed analysis, the only constitutive centromeric protein  
11 identified in *P. patens*. As expected, we observed a significant mitotic delay and chromosome  
12 alignment/segregation defects in the CENP-A RNAi lines (Figure 2–Figure supplement 8;  
13 Video 6). These phenotypes can be explained by a deficiency in proper kinetochore-  
14 microtubule attachment. Consequently, micronuclei were occasionally observed in the  
15 daughter cells, a hallmark of aneuploidy. We concluded that CENP-A, like in many  
16 organisms, is essential for equal chromosome segregation during mitosis in moss.

17 Surprisingly, we also frequently observed cells with two large nuclei in both RNAi lines  
18 (Figure 2B, 1 h 18 min), which is the typical outcome of cytokinesis failure in this cell type  
19 (22–24). To check if a similar phenotype is observed after the depletion of another  
20 kinetochore protein, we observed conditional RNAi line for SKA1, an outermost kinetochore  
21 component that does not directly interact with CENP-A and that had not been functionally  
22 characterized in the plant cells yet. As expected, mitotic delay and chromosome  
23 missegregation were observed in the RNAi line (Figure 2B–Figure supplement 8; Video 5).  
24 In addition, cytokinesis failure was also detected (Figure 2B–Video 7). To verify that the  
25 observed phenotype of SKA1 was not due to an off-target effect, we ectopically expressed  
26 RNAi-insensitive SKA1-Cerulean in the RNAi line and observed the rescue of all the above  
27 phenotypes (Figure 2–Figure supplement 9). Furthermore, we observed a similar phenotype  
28 in RNAi lines targeting CENP-C (CCAN), Nnf1 (Mis12 complex), KNL1 and Nuf2 (Ndc80  
29 complex), suggesting that cytokinesis failure is a common outcome following kinetochore  
30 malfunction (Figure 2–Video 5).

31 Although we could not detect any kinetochore enrichment of the CCAN subunit CENP-X, we  
32 analyzed its RNAi lines. Interestingly, we observed similar phenotypes to CENP-A and  
33 SKA1, including cytokinesis failure (Figure 2B–Figure supplement 8; Video 6). CENP-X  
34 RNAi phenotypes were rescued by the ectopic expression of CENP-X-Cerulean that was  
35 resistant to the RNAi construct (Figure 2–Figure supplement 9). Thus, CENP-X has lost its  
36 kinetochore localization in moss, but is still essential for chromosome segregation and cell  
37 division.

38 By analyzing a total of 44 cells from SKA1 (9 cells), CENP-X (18 cells) and CENP-A RNAi  
39 (9 cells for one construct and 8 cells for the other) lines that had lagging chromosomes, we  
40 noticed a correlation between cytokinesis failure and lagging chromosomes lingering for a  
41 relatively long time in the space between separated chromatids. We therefore quantified the  
42 duration of lagging chromosomes' residence in the midzone between separating chromatids  
43 following anaphase onset. Interestingly, a minor delay of chromosomes in the midzone ( $< 4$   
44 min) never perturbed cytokinesis (100%,  $n = 9$  for CENP-A,  $n = 4$  for CENP-X and  $n = 3$  for  
45 SKA1). By contrast, if we observed a longer delay of chromosome clearance from the  
46 midzone, even when only a single chromosome was detectable, cytokinesis defects occurred  
47 in 96% of the cells ( $n = 9, 14$  and  $5$ ; Figure 2C, D).

1 During plant cytokinesis, a bipolar microtubule-based structure known as the phragmoplast is  
2 assembled between segregating chromatids. The cell plate then forms in the phragmoplast  
3 midzone (~4 min after anaphase onset in *P. patens* caulonemal cells) and gradually expands  
4 towards the cell cortex, guided by the phragmoplast (22). We observed that microtubules  
5 reorganized into phragmoplast-like structures upon chromosome segregation in every cell,  
6 regardless of the severity of chromosome missegregation (e.g. 32 min in Figure 2B).  
7 However, high-resolution imaging showed that microtubule interdigitates at the phragmoplast  
8 midzone were abnormal in the kinetochore RNAi lines. In 5 out of 7 control cells, a sharp  
9 microtubule overlap indicated by bright GFP-tubulin signals was observed during  
10 cytokinesis, as expected from previous studies (22, 25) (yellow arrowhead in Figure 2E). In  
11 contrast, CENP-A and SKA1 RNAi lines that had lagging chromosomes and eventually  
12 failed cytokinesis never exhibited such focused overlaps (0 out of 12 cells); instead, the  
13 overlap was broader and less distinguished (Figure 2E).

14 Finally, we checked if the cell plate was formed at any point in the cells that had cytokinesis  
15 defects, using the lipophilic FM4-64 dye. We could not observe vesicle fusion at the midzone  
16 following anaphase onset; thus, the cell plate did not form in the cells that had lagging  
17 chromosomes for a long time (Figure 2–Video 8). From these results, we concluded that  
18 occupation of the midzone by lagging chromosomes for several minutes prevents proper  
19 phragmoplast assembly and cell plate formation, which subsequently causes cytokinesis  
20 failure.

### 21 **Polyploid plants are regenerated from isolated multi-nucleated cells.**

22 Lagging chromosomes are a major cause of aneuploidy in daughter cells, which is  
23 particularly deleterious for haploid cells. However, the above observation supports a different  
24 scenario, whereby cytokinesis failure induced by lagging chromosomes allows a cell to have  
25 a duplicated genome set in two or more nuclei. On the other hand, whether animal somatic  
26 cells that have failed cytokinesis can re-enter the cell cycle or not remains an ongoing debate  
27 (26–28). To address whether moss cells can recover from severe cell division defects and  
28 continue their cell cycle, we first analyzed the DNA content of cells in the CENP-A exon-  
29 targeting RNAi line, in which multi-nucleated cells were most prevalent. For comparison, we  
30 used the parental line: the nuclei of anaphase/telophase cells served as the 1N reference and  
31 randomly selected interphase nuclei as the 2N reference, as caulonemal cells are mostly in the  
32 G2 phase (18, 29). We observed that the majority of the multi-nucleated cells after CENP-A  
33 RNAi underwent DNA replication and became tetraploid or attained even higher ploidy  
34 (Figure 3A; DNA was quantified at day 5 after  $\beta$ -estradiol treatment).

35 Next, we checked if multi-nucleated cells continue cell cycling. We used SKA1 RNAi line  
36 for a long (46 h) time-lapse imaging; with this imaging, we expected to monitor the process  
37 of cytokinesis failure of a haploid cell and its fate. During the imaging period, we indeed  
38 observed cytokinesis failure and 10% or 25% multi-nucleated apical cells executed the next  
39 cell division by forming a single spindle ( $n = 43$  and  $25$  for experiments 1 and 2, respectively,  
40 Figure 3B; Video 9). The reason for the low frequency of this event is unclear; strong  
41 chromosome missegregation might result in a severe “aneuploid” state for each nucleus,  
42 whereas the cell is overall polyploid, which might change the cell physiology. Nevertheless,  
43 this data strongly suggests that cells that have undergone cytokinesis failure can continue cell  
44 cycling as diploids at a certain probability.

45 Diploid *P. patens* is known to develop protonema tissue with a few gametophores (leafy  
46 shoots) (30); therefore, a multi-nucleated cell produced by the cytokinesis failure of a  
47 caulonemal cell might proliferate and form a large protonema colony. To test this possibility,  
48

1 we isolated and cultured several cells (Figure 3C) that were seemingly multi-nuclear after  
2 SKA1 RNAi via laser dissection microscopy (note that there is an unambiguity in identifying  
3 multi-nucleate cells; see Methods for detailed explanation). After 6 weeks of culturing  
4 without  $\beta$ -estradiol (i.e. RNAi was turned off), we obtained four moss colonies, two of which  
5 consisted mainly of protonemal cells with a few gametophores (Figure 3D, colony 3 and 4).  
6 DNA staining and quantification showed that the majority of the cells derived from those two  
7 colonies had DNA content approximately double of the control haploid cells, which were  
8 regenerated in an identical manner (Figure 3E, colony 3 and 4, regenerated from cell 3 and 4,  
9 respectively). Thus, a polyploid plant was regenerated from a single multi-nucleated somatic  
10 cell.

## 11 Discussion

### 12 Kinetochores protein dynamics in a plant cell

13 This study provides a comprehensive view of the dynamics of conserved kinetochores proteins  
14 in a single cell type of *P. patens*; furthermore, to the best of our knowledge, several proteins,  
15 including borealin, KNL1 and SKA subunits, have been characterized for the first time in  
16 plant cells. The tagged proteins were expressed under their native promoter at the original  
17 chromosome locus; thus, fluorescent signals of most, if not all, proteins would represent the  
18 endogenous localization.

19 Overall, the behavior of outer subunits was largely consistent with their animal counterparts,  
20 suggesting that the mitotic function is also conserved. However, the timing of kinetochores  
21 enrichment differed from that of animal cells and even flowering plants (e.g. Arabidopsis,  
22 maize) (6, 14, 31): for example, *P. patens* Ndc80 complex gradually accumulated at the  
23 kinetochores after NEBD, unlike Arabidopsis and maize, where it showed kinetochores  
24 enrichment throughout the cell cycle (6, 14). More unexpected localizations were observed  
25 for inner CCAN subunits, namely CENP-C, CENP-O, CENP-S and CENP-X. For example,  
26 CENP-C disappeared from the centromeres shortly after mitotic exit. In animal cells, CENP-  
27 C has been suggested to act in cooperation with Mis18BP1/KNL2 to facilitate CENP-A  
28 deposition in late telophase and early G1 (2). Hence, the mechanism of CENP-A  
29 incorporation might have been modified in plants.

30 CENP-O, -S, or -X did not show kinetochores enrichment at any stage. CENP-X localization  
31 was unlikely an artifact of Citrine tagging, since the tagged protein rescued the RNAi  
32 phenotype. In human cells, sixteen CCAN subunits, forming four sub-complexes, have been  
33 identified and shown to be critical for kinetochores assembly and function, not only in cells,  
34 but also in reconstitution systems (32, 33). In plants, only four CCAN homologues have been  
35 identified through sequence homology search. It is therefore possible that less conserved  
36 CCAN subunits are present, but could not be identified by the homology search. However,  
37 the complete lack of kinetochores localization for CENP-O, -S, -X suggests that plants have  
38 lost the entire kinetochores-enriched CCAN complex. Somewhat puzzlingly, CENP-X, despite  
39 its unusual localization, remained an essential factor for chromosome segregation in *P.*  
40 *patens*. In animals, it has been proposed that CENP-S and CENP-X form a complex and play  
41 an important role in outer kinetochores assembly (34). It is an interesting target for further  
42 investigation if plant CENP-S/CENP-X preserves such a function.

### 43 Chromosome missegregation causes polyploidization

44 We observed lagging chromosomes as well as cytokinesis failure after knocking down  
45 kinetochores components. Failure in chromosome separation/segregation and cytokinesis can  
46 be caused by a single gene mutation, if the gene has multiple functions; for example, separase  
47 Rsw4 (*radially swollen4*) in *A. thaliana* is involved in sister chromatid separation, cyclin B

1 turnover and vesicle trafficking that is required for phragmoplast formation (35–38). By  
2 contrast, in our study, both phenotypes were observed after RNAi treatment of CENP-A, a  
3 constitutive centromeric histone protein that is unlikely to play a direct role in cytokinesis.  
4 Furthermore, the cytokinesis phenotype frequently appeared in RNAi lines targeting other six  
5 kinetochore proteins, and only when lagging chromosomes were present. Based on these  
6 data, we propose that persistent lagging chromosomes cause cytokinesis failure. Lagging  
7 chromosomes might act as physical obstacles to perturb phragmoplast microtubule  
8 amplification and/or cell plate formation. Alternatively, persistent lagging chromosomes  
9 might produce an unknown signal or induce a certain cell state that inhibits phragmoplast  
10 expansion and/or cell plate formation in order to prevent chromosome damage, reminiscent  
11 of the NoCut pathway in animal cytokinesis (39, 40). We favor the latter model, as abnormal  
12 microtubule interdigitates were observed in the whole phragmoplast and not limited to the  
13 region proximal to the lagging chromosome (Figure 2E). Notably, in a recent study,  
14 cytokinesis in moss protonema cells could be completed despite longer microtubule overlaps  
15 (41). It suggests that abnormal microtubule interdigitates represent the consequence of  
16 microtubule dynamics mis-regulation rather than the direct cause of cytokinesis failure.

17 Our data further suggest that, in *P. patens*, chromosome missegregation in a single cell could  
18 lead to the generation of polyploid plants. Could lagging chromosomes cause  
19 polyploidization through somatic cell lineage in wild-type plants? In our imaging of control  
20 moss cells, we could not find any lagging chromosome, since mitotic fidelity is very high in  
21 our culture conditions. Intriguingly, however, various mitotic abnormalities, including  
22 lagging chromosomes have been long observed in wild-type plants and crops, albeit at a low  
23 frequency and/or under harsh natural conditions (42–44). Those studies did not analyze the  
24 relationship between lagging chromosomes and cytokinesis integrity; we expect the presence  
25 of lagging chromosomes for a certain duration to similarly perturb cytokinesis as observed in  
26 our study of moss, since the cytokinesis process is highly conserved between bryophytes and  
27 angiosperms (45). Genome sequencing suggests that *P. patens*, like many other plant species,  
28 experienced whole genome duplication at least once during evolution (46). Polyploidization  
29 through spontaneous mitotic errors in somatic cells might have a greater impact on *de novo*  
30 formation of polyploid plants than previously anticipated.

## 31 **Materials and Methods**

### 32 **Moss culture and transformation**

33 We generally followed protocols described by Yamada *et al* (19). In brief, *Physcomitrella*  
34 *patens* culture was maintained on BCDAT medium at 25°C under continuous light.  
35 Transformation was performed with the polyethylene glycol-mediated method and successful  
36 endogenous tagging of the selected genes was confirmed by PCR (19). We used *P. patens*  
37 expressing mCherry- $\alpha$ -tubulin under the pEF1 $\alpha$  promoter as a host line, except for Mis12-  
38 mCherry line where GFP- $\alpha$ -tubulin line was used as a host line. For knockout, CRISPR (47)  
39 and RNAi transformations, we used the GH line, expressing GFP-tubulin and HistoneH2B-  
40 mRFP. *P. patens* lines developed for this study are described in Dataset S1.

### 41 **Plasmid construction**

42  
43 Plasmids and primers used in this study are listed in Dataset S2. For the C-terminal tagging,  
44 we constructed integration plasmids, in which ~800 bp C-terminus and ~800 bp 3'-UTR  
45 sequences of the kinetochore gene were flanking the *citrine* gene, the nopaline synthase  
46 polyadenylation signal (nos-ter), and the G418 resistance cassette. For the N-terminal tagging  
47 we constructed integration plasmids, in which ~800 bp 5'-UTR and ~800 bp N-terminus  
48 sequences of the kinetochore gene were flanking the *citrine* gene. CENP-A cDNA was  
49 amplified by PCR and sub-cloned into a vector containing the rice actin promoter, *citrine*  
50

1 gene, the *rbcS* terminator, the modified *aph4* cassette, and flanked by the genomic fragment  
2 of the *hb7* locus to facilitate integration. All plasmids were assembled with the In-Fusion  
3 enzyme according to manufacturer's protocol (Clontech). RNAi constructs were made by  
4 using the Gateway system (Invitrogen) with pGG624 as the destination vector (21).

### 6 **DNA staining**

7 We followed the protocol described by Vidali *et al* (48) with the following modifications:  
8 sonicated moss was cultured for 6–7 days on the BCDAT plate, containing 5  $\mu$ M  $\beta$ -estradiol  
9 for RNAi induction and 20  $\mu$ g/ml G418 to prevent contamination. Collected cells were  
10 preserved in a fixative solution (2% formaldehyde, 25 mM PIPES, pH 6.8, 5 mM  $MgCl_2$ , 1  
11 mM  $CaCl_2$ ) for 30 min and washed three times with PME buffer (25 mM PIPES, pH 6.8, 5  
12 mM  $MgCl_2$ , 5 mM EGTA). Following fixation, cells were mounted on 0.1% PEI  
13 (polyethyleneimine)-coated glass slides and subsequently incubated with 0.1% Triton X-100  
14 in PME for 30 min and 0.2% driselase (Sigma-Aldrich) in PME for 30 min. Next, cells were  
15 washed twice in PME, twice in TBS-T buffer (125 mM NaCl, 25 mM Tris-HCl, pH 8, and  
16 0.05% Tween 20) and mounted in 10  $\mu$ g/mL DAPI in TBS-T for observation. Images were  
17 acquired with the Olympus BX-51 fluorescence microscope equipped with ZEISS AxioCam  
18 506 Color and controlled by ZEN software. Fluorescent intensity was measured with ImageJ.  
19 Cytoplasmic background was subtracted.

### 21 **Live-imaging microscopy**

22 A glass-bottom dish (Mattek) inoculated with moss was prepared as described in Yamada *et*  
23 *al* (19) and incubated at 25°C under continuous light for 4–7 days before live-imaging. To  
24 observe RNAi lines, we added 5  $\mu$ M  $\beta$ -estradiol to culture medium (21). For the high  
25 magnification time-lapse microscopy, the Nikon Ti microscope (60 $\times$ 1.40-NA lens or  
26 100 $\times$ 1.45-NA lens) equipped with the spinning-disk confocal unit CSU-X1 (Yokogawa) and  
27 an electron-multiplying charge-coupled device camera (ImagEM; Hamamatsu) was used.  
28 Images were acquired every 30 s for localization analysis and every 2 min for RNAi analysis.  
29 The microscope was controlled by the Micro-Manager software and the data was analyzed  
30 with ImageJ. The rescue lines for RNAi were observed using a fluorescence microscope (IX-  
31 83; Olympus) equipped with a Nipkow disk confocal unit (CSU-W1; Yokogawa Electric)  
32 controlled by Metamorph software.

### 34 **Single cell isolation**

35 Protonema tissue of *P. patens* was sonicated, diluted with BCD medium with 0.8% agar, and  
36 spread on cellophane-covered BCDAT plates that contain 5  $\mu$ M estradiol to induce RNAi.  
37 After 5–6 days, small pieces of cellophane containing clusters of protonemal cells (each  
38 containing 3–20 cells) were cut with scissors and placed upside-down on a glass-bottom dish.  
39 Bi- or multi-nucleated cells were identified using Axio Zoom.v16. Single bi-nucleated cell  
40 (SKA1 RNAi line) or random cell (control GH line) was selected for isolation and all other  
41 cells were ablated with a solid-state ultraviolet laser (355 nm) through a 20X objective lens  
42 (LD Plan-NEOFLUAR, NA 0.40; Zeiss) at a laser focus diameter of less than 1  $\mu$ m using the  
43 laser pressure catapulting function of the PALM microdissection system (Zeiss). Irradiation  
44 was targeted to a position distantly located from the cell selected for isolation to minimize the  
45 irradiation effect. Note that visual distinction of multi-nucleated cells from those with slightly  
46 deformed nuclei is not easy in *P. patens*, since in multi-nucleated cells, the nuclei maintain  
47 very close association with each other, so that nuclear boundaries often overlap. We interpret  
48 that two of four regenerated protonemata had haploid DNA content due to our unintentional  
49 isolation of a single cell with a deformed nucleus rather than multi-nuclei. Next, a piece of  
50 cellophane with single isolated cell was transferred from the glass-bottom dish to estradiol-

1 free medium (20 µg/ml G418 was supplied to prevent bacterial/fungal contamination). DAPI  
2 staining was performed 5–6 weeks later as described above.

### 3 **Sequence analysis.**

4 Full-size amino acid sequences of the selected proteins were aligned using MAFFT ver.  
5 7.043 and then revised manually with MacClade ver. 4.08 OSX. We used the Jones-Taylor-  
6 Thornton (JTT) model to construct maximum-likelihood trees in MEGA5 software.  
7 Statistical support for internal branches by bootstrap analyses was calculated using 1,000  
8 replications. Reference numbers correspond to Phytozome ([www.phytozome.net](http://www.phytozome.net)) for  
9 *Physcomitrella patens*, the Arabidopsis Information Resource ([www.arabidopsis.org](http://www.arabidopsis.org)) for  
10 *Arabidopsis thaliana* and Uniprot ([www.uniprot.org](http://www.uniprot.org)) for *Homo sapiens*. Original protein  
11 alignments after MAFFT formatted with BoxShade ([https://embnet.vital-  
12 it.ch/software/BOX\\_form.html](https://embnet.vital-it.ch/software/BOX_form.html)) are shown in Supplemental dataset 3.

### 14 **Acknowledgements**

15 We are grateful to Dr. Yoshikatsu Sato and Nagisa Sugimoto for their assistance with laser  
16 ablation experiments; to Dr. Peishan Yi, Moé Yamada and Shu Yao Leong for comments and  
17 discussion; and Rie Inaba for technical assistance. Imaging was partly conducted in the  
18 Institute of Transformative Bio-Molecules (WPI-ITbM) at Nagoya University, supported by  
19 Japan Advanced Plant Science Network. This work was funded by JSPS KAKENHI  
20 (17H06471, 17H01431) to G.G. The authors declare no competing financial interests.

### 21 **References**

- 22 1. Potapova T, Gorbsky G (2017) The Consequences of Chromosome Segregation Errors  
23 in Mitosis and Meiosis. *Biology (Basel)* 6(1). doi:10.3390/biology6010012.
- 24 2. Musacchio A, Desai A (2017) A Molecular View of Kinetochore Assembly and  
25 Function. *Biology (Basel)* 6(5). doi:10.3390/biology6010005.
- 26 3. Yu H, Hiatt EN, Dawe RK (2000) The plant kinetochore. *Trends Plant Sci* 5(12):543–  
27 547.
- 28 4. Hooff JJE Van, Kops GJPL, Tromer E, Wijk LM Van (2017) Evolutionary dynamics  
29 of the kinetochore network in eukaryotes as revealed by comparative genomics.  
30 *EMBO Rep* 18(9):1559–1571.
- 31 5. Yamada M, Goshima G (2017) Mitotic Spindle Assembly in Land Plants: Molecules  
32 and Mechanisms. *Biology (Basel)* 6(1). doi:10.3390/biology6010006.
- 33 6. Jinwoo Shin, Goowon Jeong, Jong-Yoon Park HK and IL (2018) MUN (MERISTEM  
34 UNSTRUCTURED), encoding a SPC24 homolog of NDC80 kinetochore complex,  
35 affects development through cell division in *Arabidopsis thaliana*. *Plant J*  
36 12(10):3218–3221.
- 37 7. Zhang H, et al. (2018) Role of the BUB3 protein in phragmoplast microtubule  
38 reorganization during cytokinesis. *Nat Plants* 4(7):485–494.
- 39 8. Wang M, et al. (2012) BRK1, a Bub1-Related Kinase, Is Essential for Generating  
40 Proper Tension between Homologous Kinetochores at Metaphase I of Rice Meiosis.  
41 *Plant Cell* 24(12):4961–4973.



- 1 9. Paganelli L, Lecomte P, Deslandes L (2009) Spindle Assembly Checkpoint Protein  
2 Dynamics Reveal Conserved and Unsuspected Roles in Plant Cell Division. *PLoS One*  
3 4(8). doi:10.1371/journal.pone.0006757.
- 4 10. Komaki S, Schnittger A (2017) The Spindle Assembly Checkpoint in Arabidopsis Is  
5 Rapidly Shut Off during Severe Stress. *Dev Cell* 43(2):172–185.
- 6 11. Lermontova I, et al. (2013) Arabidopsis KINETOCHORE NULL2 Is an Upstream  
7 Component for Centromeric Histone H3 Variant cenH3 Deposition at Centromeres.  
8 *Plant Cell* 25(9):3389–3404.
- 9 12. Sandmann M, et al. (2017) Targeting of Arabidopsis KNL2 to Centromeres Depends  
10 on the Conserved CENPC-k Motif in Its C Terminus. *Plant Cell* 29(1):144–155.
- 11 13. Sato H, Shibata F, Murata M (2005) Characterization of a Mis12 homologue in  
12 Arabidopsis thaliana. *Chromosom Res* 13(8):827–834.
- 13 14. Du Y, Dawe RK (2007) Maize NDC80 is a constitutive feature of the central  
14 kinetochore. *Chromosom Res* 15(6):767–775.
- 15 15. Ogura Y, et al. (2004) Characterization of a CENP-C homolog in Arabidopsis thaliana.  
16 *Genes Genet Syst* 79(3):139–144.
- 17 16. Cove D, Bezanilla M, Harries P, Quatrano R (2006) Mosses as Model Systems for the  
18 Study of Metabolism and Development. *Annu Rev Plant Biol* 57:497–520.
- 19 17. Sato Y, et al. (2017) Cells reprogramming to stem cells inhibit the reprogramming of  
20 adjacent cells in the moss *Physcomitrella patens*. *Sci Rep* 7(1). doi:10.1038/s41598-  
21 017-01786-1.
- 22 18. Ishikawa M, et al. (2011) *Physcomitrella* Cyclin-Dependent Kinase A Links Cell  
23 Cycle Reactivation to Other Cellular Changes during Reprogramming of Leaf Cells C  
24 W OA. *Plant Cell* 23(8):2924–2938.
- 25 19. Yamada, Moe, Miki T, Goshima G (2016) Imaging Mitosis in the Moss  
26 *Physcomitrella patens*. *Methods Mol Biol* 1413:293–326.
- 27 20. Nakaoka Y, et al. (2012) An Inducible RNA Interference System in *Physcomitrella*  
28 *patens* Reveals a Dominant Role of Augmin in Phragmoplast Microtubule Generation.  
29 *Plant Cell* 24(4):1478–1493.
- 30 21. Miki T, Nakaoka Y, Goshima G (2016) Live Cell Microscopy-Based RNAi Screening  
31 in the Moss *Physcomitrella patens*. *Methods Mol Biol* 1470:225–246.
- 32 22. Kosetsu K, Keijzer J De, Janson ME, Goshima G (2013) MICROTUBULE-  
33 ASSOCIATED PROTEIN65 Is Essential for Maintenance of Phragmoplast Bipolarity  
34 and Formation of the Cell Plate in *Physcomitrella patens*. *Plant Cell* 25:4479–4492.
- 35 23. Miki T, Naito H, Nishina M, Goshima G (2014) Endogenous localizome identifies 43  
36 mitotic kinesins in a plant cell. *Proc Natl Acad Sci* 111(11):1053–1061.
- 37 24. Naito H, Goshima G (2015) NACK Kinesin Is Required for Metaphase Chromosome

- 1 Alignment and Cytokinesis in the Moss *Physcomitrella Patens*. *Cell Struct Funct*  
2 41:31–41.
- 3 25. Hiwatashi Y, et al. (2008) Kinesins Are Indispensable for Interdigitation of  
4 Phragmoplast Microtubules in the Moss *Physcomitrella patens*. *Plant Cell*  
5 20(11):3094–3106.
- 6 26. Ganem NJ, Pellman D (2007) Limiting the Proliferation of Polyploid Cells. *Cell*  
7 131(3):437–440.
- 8 27. Uetake Y, Sluder G (2004) Cell cycle progression after cleavage failure: Mammalian  
9 somatic cells do not possess a “tetraploidy checkpoint.” *J Cell Biol* 165(5):609–615.
- 10 28. Panopoulos A, et al. (2014) Failure of cell cleavage induces senescence in tetraploid  
11 primary cells. *Mol Biol Cell* 25(20):3105–3118.
- 12 29. Schween G, Gorr G, Hohe A, Reski R (2003) Unique tissue-specific cell cycle in  
13 *Physcomitrella*. *Plant Biol* 5(1):50–58.
- 14 30. Schween G, Schulte J, Reski R (2005) Effect of Ploidy Level on Growth ,  
15 Differentiation , and Morphology in *Physcomitrella patens*. *Bryologist* 108(1):27–35.
- 16 31. Hori, T. Tokuko Haraguchi, Yasushi Hiraoka HK and TF (2003) Dynamic behavior of  
17 Nuf2-Hec1 complex that localizes to the centrosome and centromere and is essential  
18 for mitotic progression in vertebrate cells. *J Cell Sci* 116(16):3347–3362.
- 19 32. Guse A, Carroll CW, Moree B, Fuller CJ, Straight AF (2012) In vitro centromere and  
20 kinetochore assembly on defined chromatin templates. *Nature* 477(7364):354–358.
- 21 33. Weir JR, et al. (2016) Insights from biochemical reconstitution into the architecture of  
22 human kinetochores. *Nature* 537(7619):249–253.
- 23 34. Amano M, et al. (2009) The CENP-S complex is essential for the stable assembly of  
24 outer kinetochore structure. *J Cell Biol* 186(2):173–182.
- 25 35. Chang DC, Xu N, Luo KQ (2003) Degradation of cyclin B is required for the onset of  
26 anaphase in mammalian cells. *J Biol Chem* 278(39):37865–37873.
- 27 36. Yang X, et al. (2011) The radially swollen 4 separase mutation of *Arabidopsis thaliana*  
28 blocks chromosome disjunction and disrupts the radial microtubule system in  
29 meiocytes. *PLoS One* 6(4). doi:10.1371/journal.pone.0019459.
- 30 37. Moschou PN, et al. (2013) The Caspase-Related Protease Separase (EXTRA  
31 SPINDLE POLES) Regulates Cell Polarity and Cytokinesis in *Arabidopsis*. *Plant Cell*  
32 25(6):2171–2186.
- 33 38. Wu S, et al. (2010) A conditional mutation in *Arabidopsis thaliana* separase induces  
34 chromosome non-disjunction, aberrant morphogenesis and cyclin B1;1 stability.  
35 *Development* 137:953–961.
- 36 39. Norden C, et al. (2006) The NoCut Pathway Links Completion of Cytokinesis to  
37 Spindle Midzone Function to Prevent Chromosome Breakage. *Cell* 125(1):85–98.

- 1 40. Amaral N, et al. (2016) The Aurora-B-dependent NoCut checkpoint prevents damage  
2 of anaphase bridges after DNA replication stress. *Nat Cell Biol* 18(5):516–526.
- 3 41. de Keijzer J, Kieft H, Ketelaar T, Goshima G, Janson ME (2017) Shortening of  
4 Microtubule Overlap Regions Defines Membrane Delivery Sites during Plant  
5 Cytokinesis. *Curr Biol* 27(4):514–520.
- 6 42. Menéndez-Yuffá A, Fernandez-Da Silva R, Rios L, Xena de Enrech N (2000) Mitotic  
7 aberrations in coffee (*Coffea arabica* cv. 'Catimor') leaf explants and their derived  
8 embryogenic calli. *Electron J Biotechnol* 3(2):161–166.
- 9 43. Nichols C (1941) Spontaneous chromosome aberrations in *Allium*. *Genetics* 26(1):89–  
10 100.
- 11 44. Kvitko O V., Muratova EN, Bazhina E V. (2011) Cytogenetics of *Abies sibirica* in  
12 decline fir stands of West Sayan High Mountains. *Contemp Probl Ecol* 4(6):641–646.
- 13 45. Smertenko A, et al. (2017) Plant Cytokinesis: Terminology for Structures and  
14 Processes. *Trends Cell Biol* 27(12):885–894.
- 15 46. Rensing S, et al. (2008) The *Physcomitrella* Genome Reveals Evolutionary Insights  
16 into the Conquest of Land by Plants. *Science* 319(5859):64–69.
- 17 47. Lopez-Obando M, et al. (2016) Simple and Efficient Targeting of Multiple Genes  
18 Through CRISPR-Cas9 in *Physcomitrella patens*. *G3 Genes|Genomes|Genetics*  
19 6(11):3647–3653.
- 20 48. Vidali L, Augustine RC, Kleinman KP, Bezanilla M (2007) Profilin Is Essential for  
21 Tip Growth in the Moss *Physcomitrella patens*. *Plant Cell* 19(11):3705–3722.

22

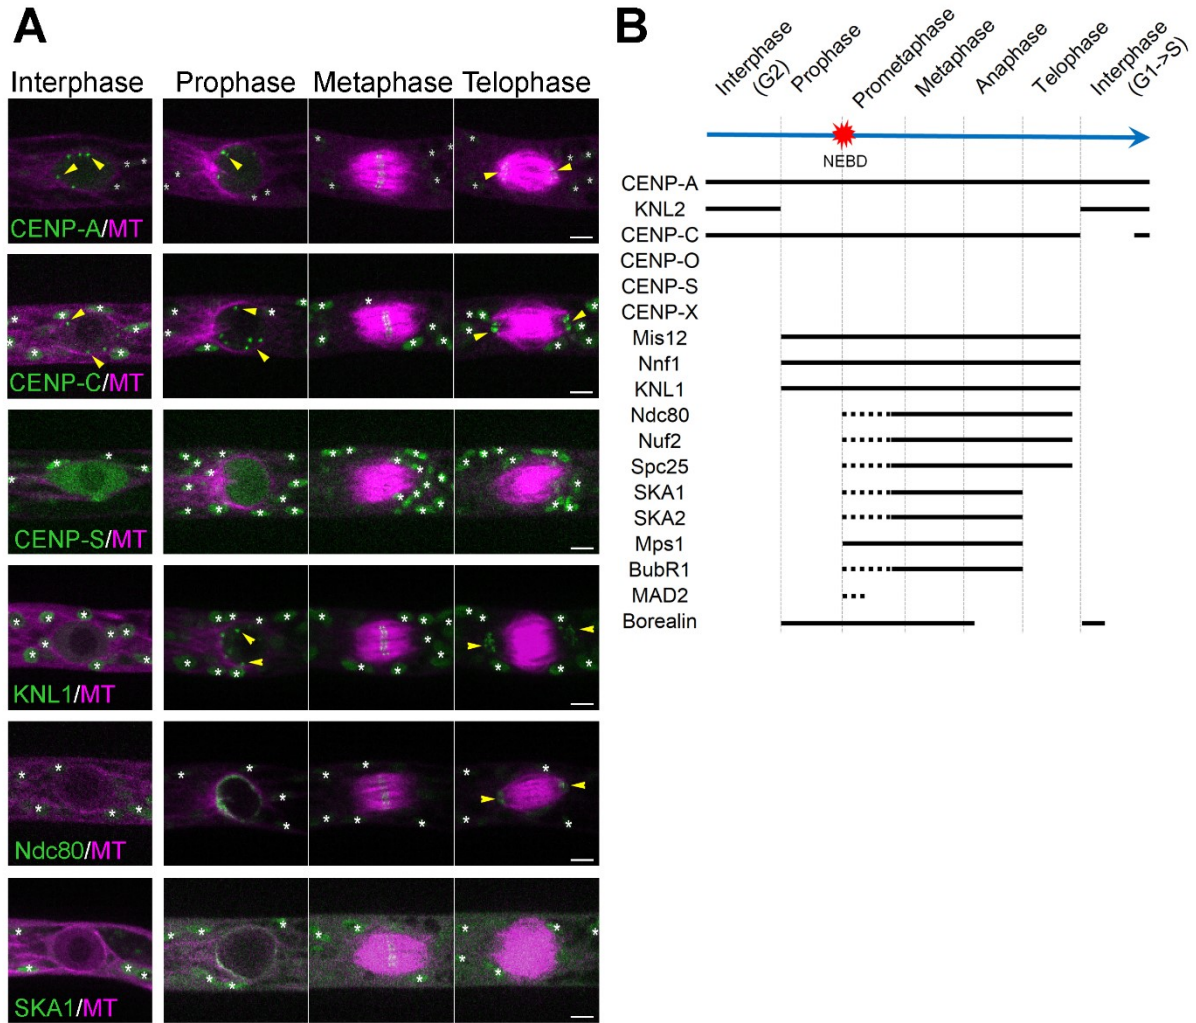

**Figure 1. Unconventional localization of kinetochore proteins in *P. patens*.**

(A) Live imaging of *P. patens* caulonemal apical cells expressing mCherry-tubulin and selected kinetochore proteins: Citrine-CENP-A; Citrine-CENP-C; Citrine-CENP-S; KNL1-Citrine; Ndc80-Citrine and SKA1-Citrine. Full localization data can be found in Supplemental data. Some kinetochore signals are marked with yellow arrowheads, whereas autofluorescent chloroplasts are all marked with white asterisks. Images were acquired at a single focal plane. Bars, 5  $\mu$ m. See Figure supplements 1-7, Video 1-4. (B) Timeline of kinetochore localization during the cell cycle in *P. patens* caulonemal apical cells. Solid lines correspond to the detection of clear kinetochore signals, whereas dotted lines indicate more dispersed signals.

## A Cytokinesis complete

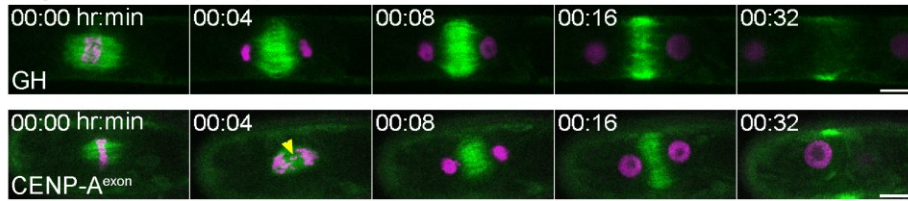

## B Cytokinesis failure

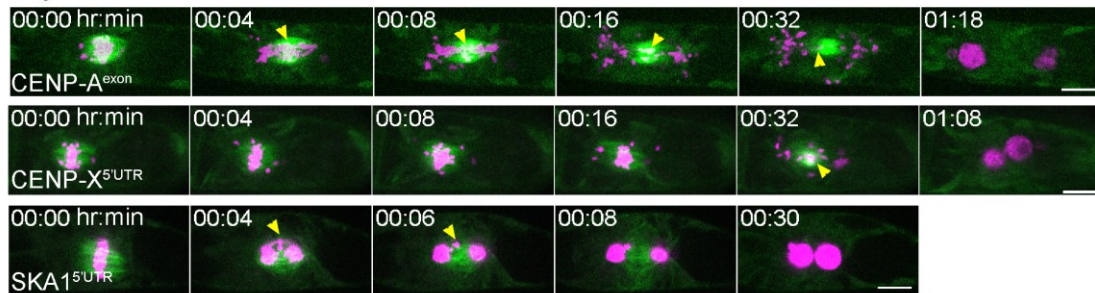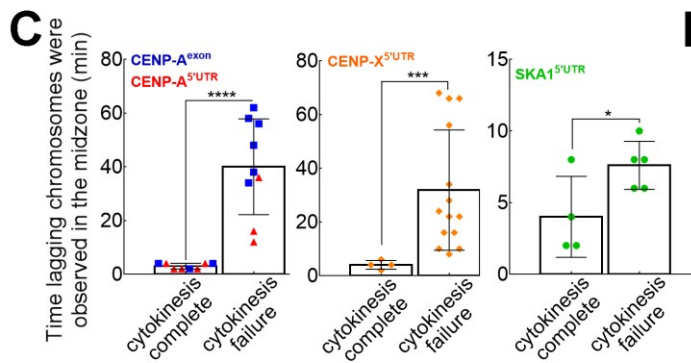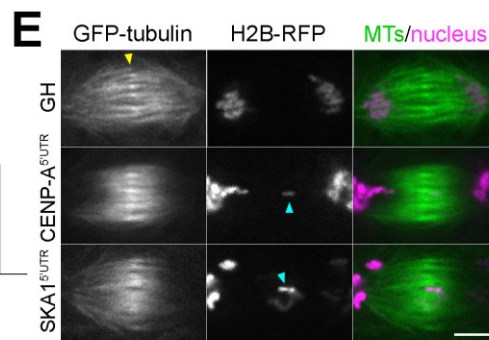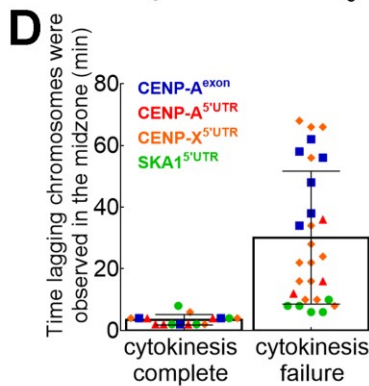

### Figure 2. Lagging chromosomes in anaphase induce cytokinesis failure.

(A, B) Lagging chromosomes (yellow arrowheads) present for several minutes in the midzone between separated chromatids cause cytokinesis failure in CENP-A, CENP-X and SKA1 RNAi lines. GH represents a control line. Bars, 10  $\mu$ m. See Figure supplement 8-9, Video 5-8. (C, D) Correlation between cytokinesis failure and duration of lagging chromosomes observed in the midzone in the individual RNAi lines (C) and as combined data (D). Asterisks indicate significant differences between two groups (lagging chromosomes observed for short time or for several minutes) for two outcomes: cytokinesis complete and cytokinesis failure, calculated individually for CENP-A; CENP-X and SKA1 RNAi lines (\* $P = 0.0476$ , \*\*\* $P = 0.0003$ , \*\*\*\* $P < 0.0001$ ; Fisher's test; see Table supplement 1). Each data point corresponds to a single cell. Mean  $\pm$  SD are presented. (E) Representative images of the microtubule overlap in the phragmoplast in the control line (GH) and in RNAi lines (CENP-A and SKA1) with lagging chromosomes. Note that microtubule overlaps appear more broad and fuzzy in RNAi cells. Yellow arrow indicates microtubule overlaps, whereas cyan arrows point to lagging chromosomes. Images were acquired with z-stacks and a single focal plane that best shows microtubule overlaps is presented. Bar, 5  $\mu$ m.

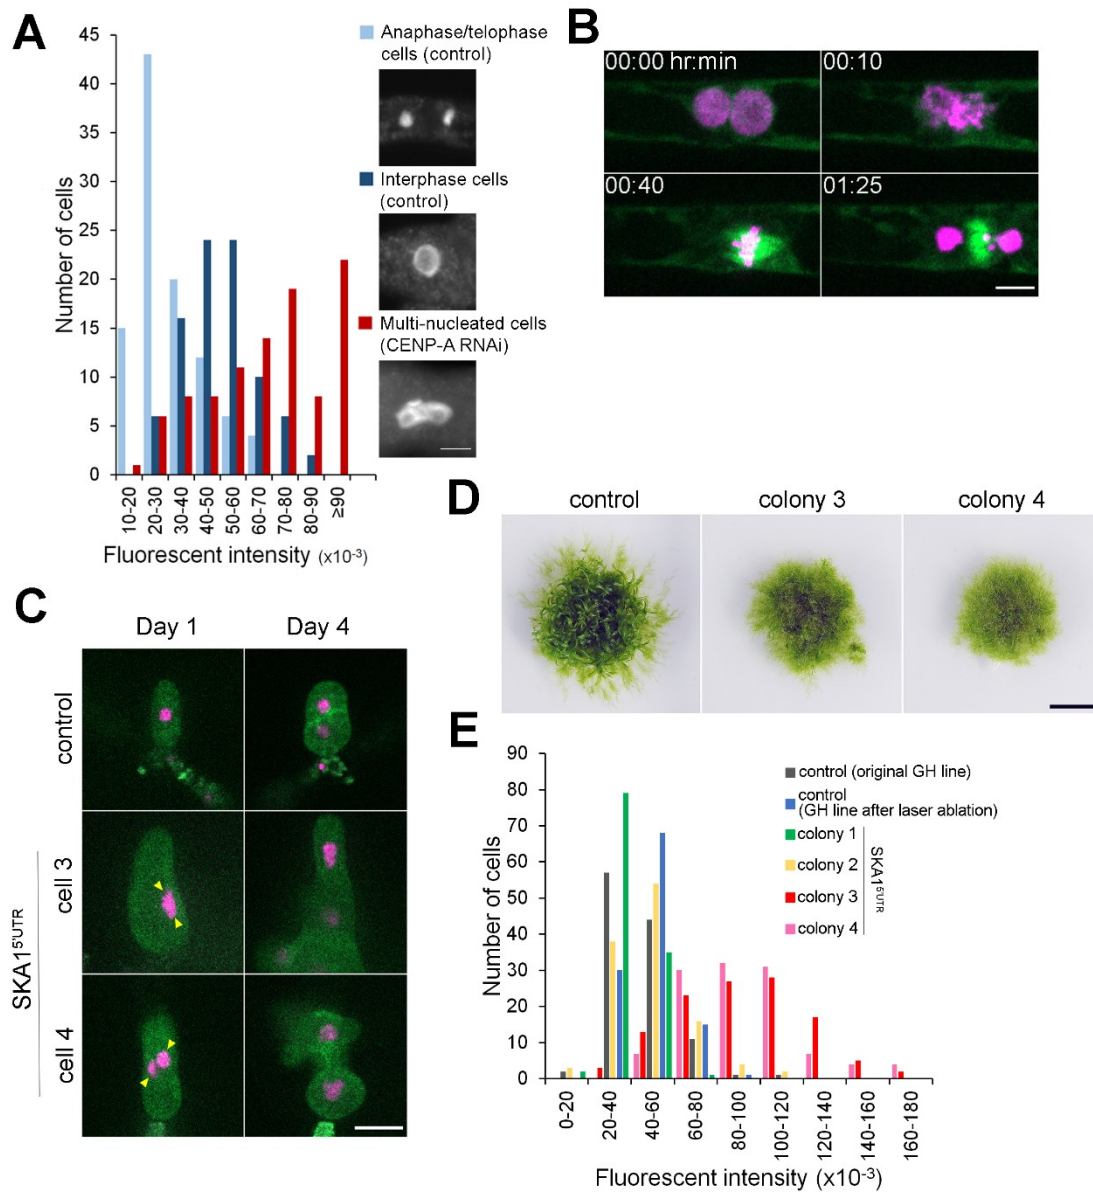

**Figure 3. Cytokinesis failure in somatic cells can generate plants with whole-genome duplication**

(A) Quantification of the nuclear DNA content. Anaphase/tephase cells were used as a standard for 1N nuclei (light blue). Interphase cells randomly selected in the control line mostly had double amounts of DNAs as expected (dark blue), whereas cells that failed cytokinesis had higher ploidy (red). DNA amounts are shown as fluorescent intensity of the DAPI-stained nuclei per cell after subtraction of the cytoplasmic background. (B) Representative images of mitotic entry and single spindle formation of the multi-nucleated cell in the *P. patens* SKA1 RNAi line. Bar, 5  $\mu$ m. See Video 9. (C) Regeneration of a single cell isolated by laser dissection microscopy from the control cell line (GH) or multi-nucleated cells from SKA1 RNAi line (multi-nuclei are marked with yellow arrowheads). Bar, 50  $\mu$ m. (D) Moss colonies regenerated from single cells. Bar, 0.5 cm. (E) Quantification of the nuclear DNA content in the interphase nucleus of regenerated moss colonies, corresponding to (C) and (D).

## Supplemental materials

### Abbreviations

CCAN – Constitutive Centromere Associated Network

Cit – Citrine

CPC – Chromosome Passenger Complex

GFP – green fluorescent protein

HR – homologous recombination

mCh – mCherry

MTs - microtubules

NEBD – nuclear envelope breakdown

RNAi – RNA interference

SAC – spindle assembly checkpoint

### Full names

BMF1 (*Bub1*) - BUB1/MAD3 family 1

BubR1 (BMF2) - BUB1-related protein 1 (BUB1/MAD3 family 2)

CENP-A (*cenH3*) – centromere protein A (*centromeric Histone 3*)

CENP-C – centromere protein C

CENP-O – centromere protein O

CENP-S (*FAAP16, MHF1*) – Centromere protein S (*Fanconi anemia-associated polypeptide of 16 kDa; FANCM-associated histone fold protein 1*)

CENP-X (*FAAP10, MHF2*) – Centromere protein X (*Fanconi anemia-associated polypeptide of 10 kDa; FANCM-associated histone fold protein 2*)

Dsn1 – dosage suppressor of Nnf1

KNL1 (*Spc7; Blinkin*) – kinetochore null 1 (*spindle pole body component 7; Bub-linking kinetochore protein*)

KNL2 (*MIS18BP1*) – kinetochore null 2 (*Mis18-binding protein 1*)

MAD2 - mitotic arrest deficient 2

Mis12 – minichromosome instability 12

Mps1 – serine/threonine-protein kinase MPS1 (monopolar spindle protein 1)

Ndc80 (*HEC1*) - nuclear division cycle protein 80 (*highly expressed in cancer 1*)

Nnf1 (*PMF1*) - necessary for nuclear function 1 (*Polyamine-modulated factor 1*)

Nuf2 - nuclear filament-containing protein 2

SKA1, 2, 3 – spindle and kinetochore associated protein 1, 2, 3

Spc24, 25 - spindle pole body component 24, 25

Taf9 - TATA box binding protein (TBP)-associated factor

| Accession number                                                                         | Citrine tagging                                                 |                       | Frameshift by CRISPR/Cas9 | Knockout by HR   | RNAi phenotypes                                                         |
|------------------------------------------------------------------------------------------|-----------------------------------------------------------------|-----------------------|---------------------------|------------------|-------------------------------------------------------------------------|
|                                                                                          | N-terminal                                                      | C-terminal            |                           |                  |                                                                         |
| 76 <i>Pp</i> CENP-A<br>At CENP-A<br>92 <i>Hs</i> CENP-A                                  | Pp3c1_20640<br>AT1G01370<br>P6843                               | + ( <i>hb7</i> locus) |                           | failed           | chromosome missegregation; cytokinesis failure; multinuclei             |
| 72 <i>Pp</i> KNL2_1<br>74 <i>Pp</i> KNL2_2<br>At KNL2<br>93 <i>Hs</i> Mis18BP1           | Pp3c14_3020<br>Pp3c10_3430<br>AT5G02520<br>Q6P0N0               | +                     |                           |                  |                                                                         |
| 87 <i>Pp</i> CENP-C<br>At CENP-C<br>62 <i>Hs</i> CENP-C                                  | Pp3c2_32580<br>AT1G15660<br>Q03188                              | + +                   | -                         | failed           | chromosome missegregation; cytokinesis failure; multinuclei; cell death |
| 90 <i>Pp</i> CENP-O_1<br>56 <i>Pp</i> CENP-O_2<br>At CENP-O<br>81 <i>Hs</i> CENP-O       | Pp3c5_16590<br>Pp3c6_9310<br>AT5G10710<br>Q9BU64                | + +                   | +                         | failed           |                                                                         |
| 77 <i>Pp</i> CENP-S<br>56 <i>At</i> CENP-S<br>83 <i>Hs</i> CENP-S                        | Pp3c2_1780<br>AT5G50930<br>Q8N2Z9                               | + failed              | +                         |                  |                                                                         |
| 74 <i>Pp</i> Taf9<br>At Taf9<br>92 <i>Hs</i> Taf9                                        | Pp3c19_19770<br>AT1G54140<br>Q16594                             | +                     | -                         | failed           |                                                                         |
| 85 <i>Pp</i> CENP-X<br>93 <i>At</i> CENP-X<br>87 <i>Hs</i> CENP-X                        | Pp3c15_7370<br>AT1G78790<br>A8MT69                              | failed +              |                           | failed           | chromosome missegregation; cytokinesis failure; multinuclei             |
| 77 <i>Pp</i> KNL1<br>87 <i>At</i> KNL1<br>88 <i>Hs</i> KNL1                              | Pp3c6_1750<br>AT2G04235<br>Q8NG31                               | +                     |                           | failed           | chromosome missegregation; cytokinesis failure; multinuclei             |
| 68 <i>Pp</i> Mis12<br>72 <i>At</i> Mis12<br>72 <i>Hs</i> Mis12                           | Pp3c2_13760<br>AT5G35520<br>Q9H081                              | + ( <i>mCherry</i> )  | -                         | failed           | no phenotype (Nakaoka, et al. Plant Cell, 2012)                         |
| 51 <i>Pp</i> Nnf1<br>88 <i>At</i> Nnf1<br>84 <i>Hs</i> PMF1                              | Pp3c23_7640<br>AT4G19350<br>Q6P1K2                              | +                     |                           | failed           | chromosome missegregation; cytokinesis failure; multinuclei             |
| 75 <i>Pp</i> Dsn1_1<br>86 <i>Pp</i> Dsn1_2<br>86 <i>At</i> Dsn1<br>86 <i>Hs</i> Dsn1     | Pp3c3_35410<br>Pp3c8_2210<br>AT3G27520<br>Q9H410                |                       | failed<br>failed          | failed<br>failed |                                                                         |
| 60 <i>Pp</i> NUF2<br>93 <i>At</i> NUF2<br>93 <i>Hs</i> NUF2                              | Pp3c12_6220<br>AT1G61000<br>Q9BZD4                              | +                     |                           | failed           | chromosome missegregation; cytokinesis failure; multinuclei             |
| 93 <i>Pp</i> Ndc80_1<br>74 <i>Pp</i> Ndc80_2<br>At Ndc80<br>96 <i>Hs</i> Ndc80           | Pp3c11_11580<br>Pp3c7_8870<br>AT3G54630<br>O14777               | +                     | +                         | failed           | multinuclei                                                             |
| 60 <i>Pp</i> Spc24<br>79 <i>At</i> Spc24_1<br>69 <i>At</i> Spc24_2<br>94 <i>Hs</i> Spc24 | Pp3c4_17930<br>AT3G08880<br>AT5G01570<br>Q8NBT2                 |                       |                           |                  |                                                                         |
| 43 <i>Pp</i> Spc25_1<br>82 <i>At</i> Spc25<br>82 <i>Hs</i> Spc25                         | Pp3c8_1270<br>Pp3c3_37370<br>AT3G48210<br>Q9HBM1                | +                     |                           |                  |                                                                         |
| 75 <i>Pp</i> SKA1<br>80 <i>At</i> SKA1<br>80 <i>Hs</i> SKA1                              | Pp3c6_12030<br>AT3G60660<br>Q96BD8                              | +                     |                           | failed           | chromosome missegregation; cytokinesis failure; multinuclei             |
| 75 <i>Pp</i> SKA2_1<br>73 <i>Pp</i> SKA2_2<br>At SKA2<br>55 <i>Hs</i> SKA2               | Pp3c17_11010<br>Pp3c14_9080<br>AT2G24970<br>Q8WVK7              | +                     |                           |                  |                                                                         |
| 91 <i>Pp</i> SKA3_1<br>82 <i>Pp</i> SKA3_2<br>At SKA3<br>79 <i>Hs</i> SKA3               | Pp3c4_24350<br>Pp3c26_10880<br>AT5G06590<br>Q8IX90              |                       |                           |                  |                                                                         |
| 86 <i>Pp</i> Borealin<br>48 <i>At</i> Borealin<br>98 <i>Hs</i> Borealin                  | Pp3c20_6090<br>AT4G39630<br>Q53HL2                              | +                     |                           | failed           | multinuclei                                                             |
| 98 <i>Pp</i> Mps1_1<br>69 <i>Pp</i> Mps1_2<br>At Mps1<br>96 <i>Hs</i> Mps1               | Pp3c16_20900<br>Pp3c6_320<br>AT1G77720<br>P33981                | +                     | +   -<br>-   +            | failed<br>failed |                                                                         |
| 86 <i>Pp</i> BubR1_1<br>87 <i>Pp</i> BubR1_2<br>At BMF2<br>At BMF3<br>96 <i>Hs</i> BubR1 | Pp3c20_12130<br>Pp3c24_5040<br>AT2G33560<br>AT5G05510<br>O60566 | failed +              | -                         | failed<br>failed |                                                                         |
| 87 <i>Pp</i> MAD2<br>98 <i>At</i> MAD2<br>98 <i>Hs</i> MAD2                              | Pp3c4_13910<br>AT3G25980<br>Q13257                              | +                     | +                         |                  |                                                                         |

**Figure supplement 1. Summary of kinetochore protein tagging and disruption/knockdown in *P. patens***  
 (Left) Maximum-likelihood phylogenetic trees of conserved centromere/kinetochore proteins in *Physcomitrella patens*, *Arabidopsis thaliana* and *Homo sapiens*. Numbers represent bootstrapping values (above 50%) calculated from 1,000 replications. Accession numbers for each protein correspond to Phytozome (<https://phytozome.jgi.doe.gov/>) for *P. patens*; TAIR (<https://www.arabidopsis.org/>) for *A. thaliana* and UniProt (<http://www.uniprot.org/>) for *H. sapiens*. (Middle) Summary of Citrine tagging pursued in this study. (Right) Summary of knockout, CRISPR/Cas9 frameshift (“-” indicates that frameshift mutations could not be obtained) and RNAi experiments pursued in this study. HR stands for homologous recombination. “+” indicates successful transgenic line selection.



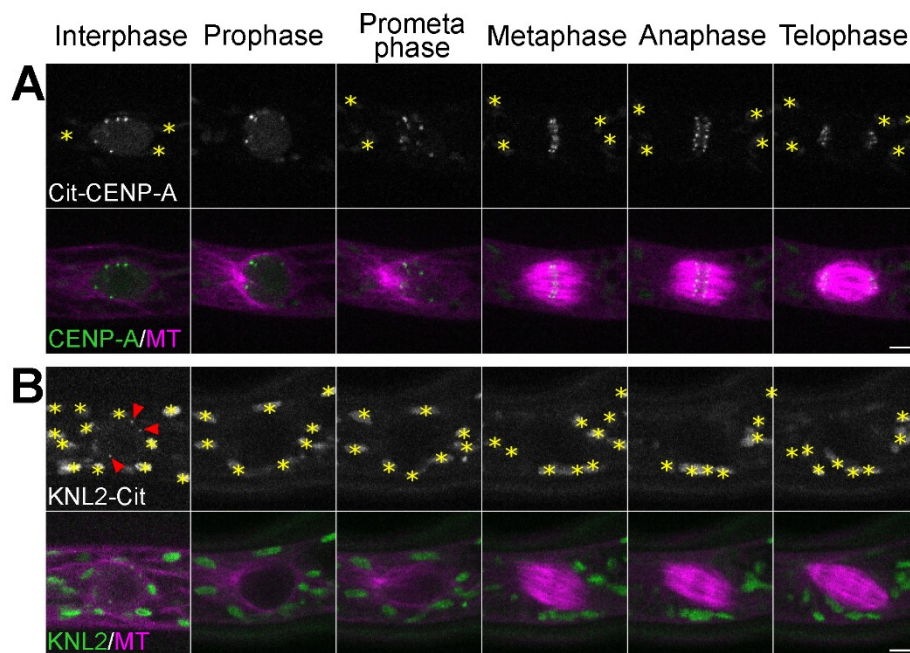

1  
2  
3  
4  
5  
6  
7  
8

**Figure supplement 2. Localization of CENP-A and KNL2/MIS18BP1 during cell division**

Live imaging of *P. patens* protonemal apical cells expressing mCherry-tubulin (magenta) and Citrine-CENP-A (A) or KNL2-Citrine (B). Citrine-CENP-A data is an expanded version of Figure 1. Autofluorescent chloroplasts are marked with yellow asterisks. Images were obtained at a single focal plane. CENP-A was localized at the centromeric region throughout the cell cycle, whereas KNL2-Citrine was visible only during interphase (red arrowheads). Bars, 5 μm.

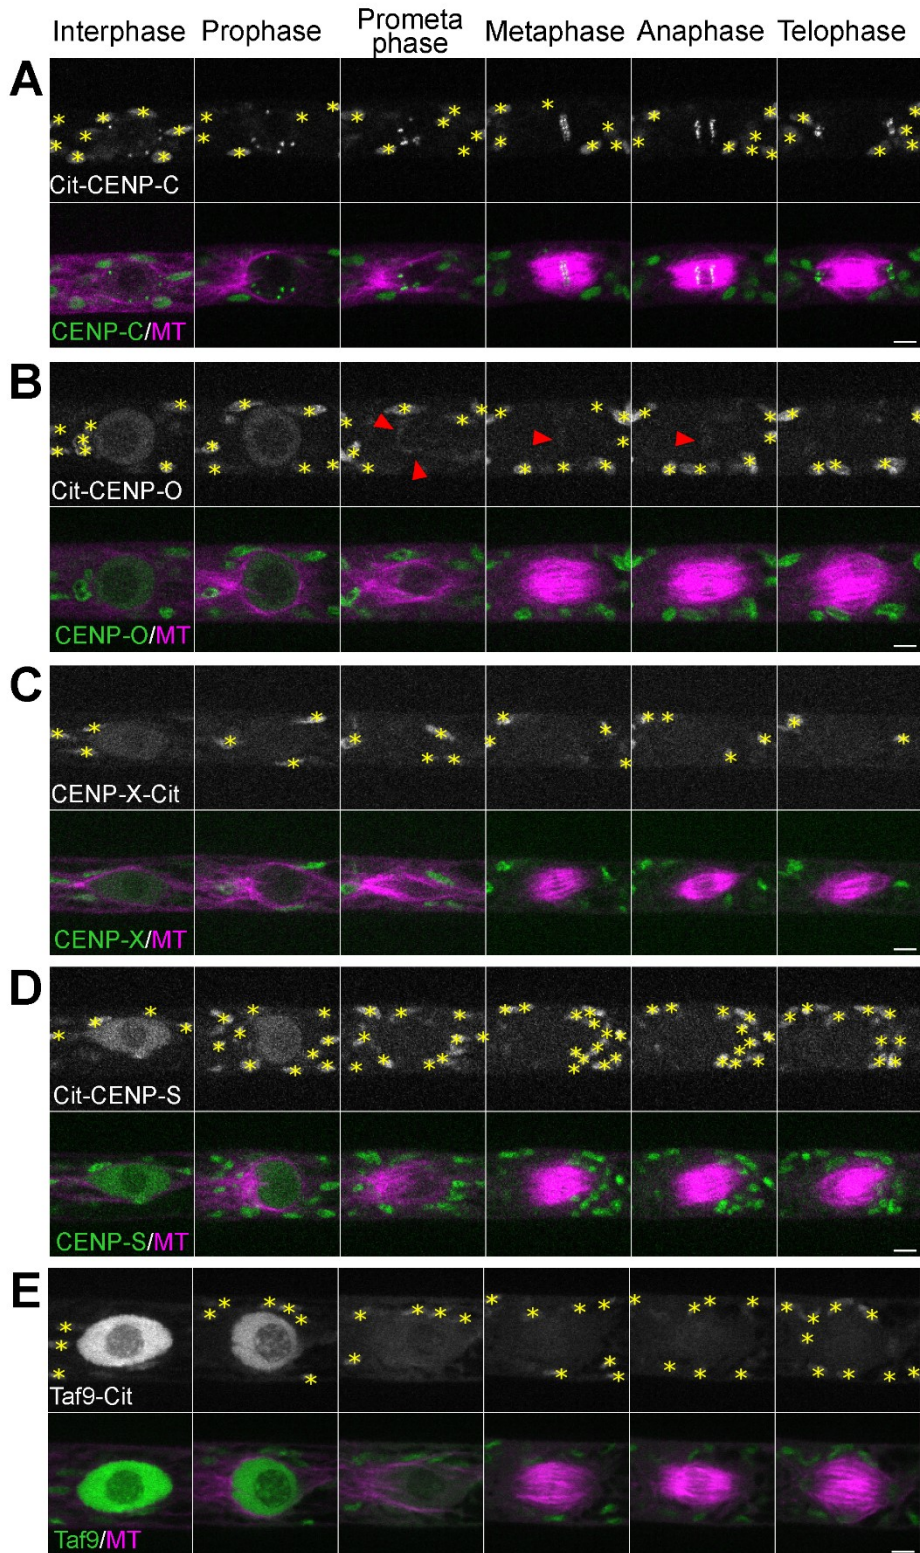

**Figure supplement 3. Localization of CCAN proteins during cell division**

Live imaging of *P. patens* protonemal apical cells expressing mCherry-tubulin (magenta) and Citrine-tagged (green) CENP-C (A), CENP-O (B), CENP-X (C), CENP-S (D) and CENP-S-like protein Taf9 (E). Citrine-CENP-C and Citrine-CENP-S data are expanded versions of Figure 1. Autofluorescent chloroplasts are marked with yellow asterisks. Images were obtained at a single focal plane. CENP-C was localized at the centromere from G2 to telophase, whereas none of the other CCAN proteins showed punctate signals throughout the cell cycle. CENP-O showed weak midzone localization from prometaphase to anaphase (arrowheads). Bars, 5  $\mu$ m.

## A CENP-A/MT

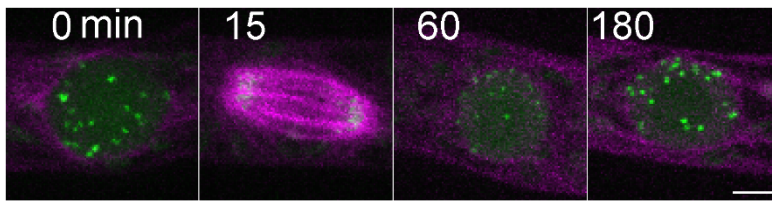

## B CENP-C/MT

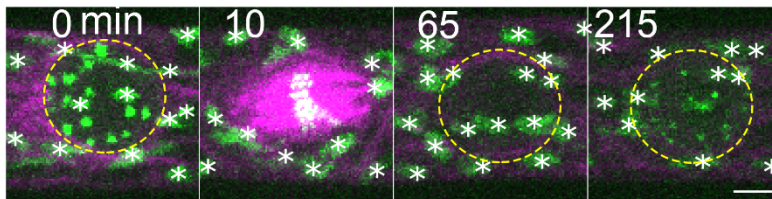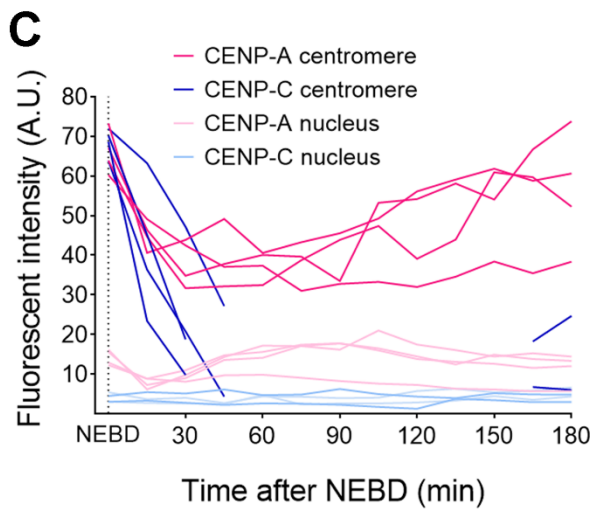

### Figure supplement 4. CENP-C is not a constitutive centromeric protein in *P. patens*

Citrine-CENP-A (A) and Citrine-CENP-C (B) localization starting from NEBD. At each time point, ten z-sections were acquired (separated by 1  $\mu\text{m}$ ). Merged images of mCherry-tubulin (single focal plane) and a maximum Z-projection of Citrine-CENP-A or -CENP-C are presented. Note that Citrine-CENP-C (B) brightness/contrast were enhanced to confirm no centromeric signals at 65 min. White stars label autofluorescent chloroplasts and yellow dotted lines mark the position of the nucleus. Bars, 5  $\mu\text{m}$ . (C) Relative intensity plot of Citrine signals at the centromeres and at the non-centromeric region in the nucleus (background measurement). Each line represents average relative fluorescent intensity of  $\geq 6$  centromeres or  $\geq 6$  non-centromeric regions inside the nucleus in a single cell (four cells analyzed for both Citrine-CENP-A and Citrine-CENP-C lines), measured every 15 min from the maximum Z-projection. Note that we could not identify centromeric Citrine-CENP-C signals during  $\sim 2$  h after mitotic exit, and therefore, the data are missing from the graph.

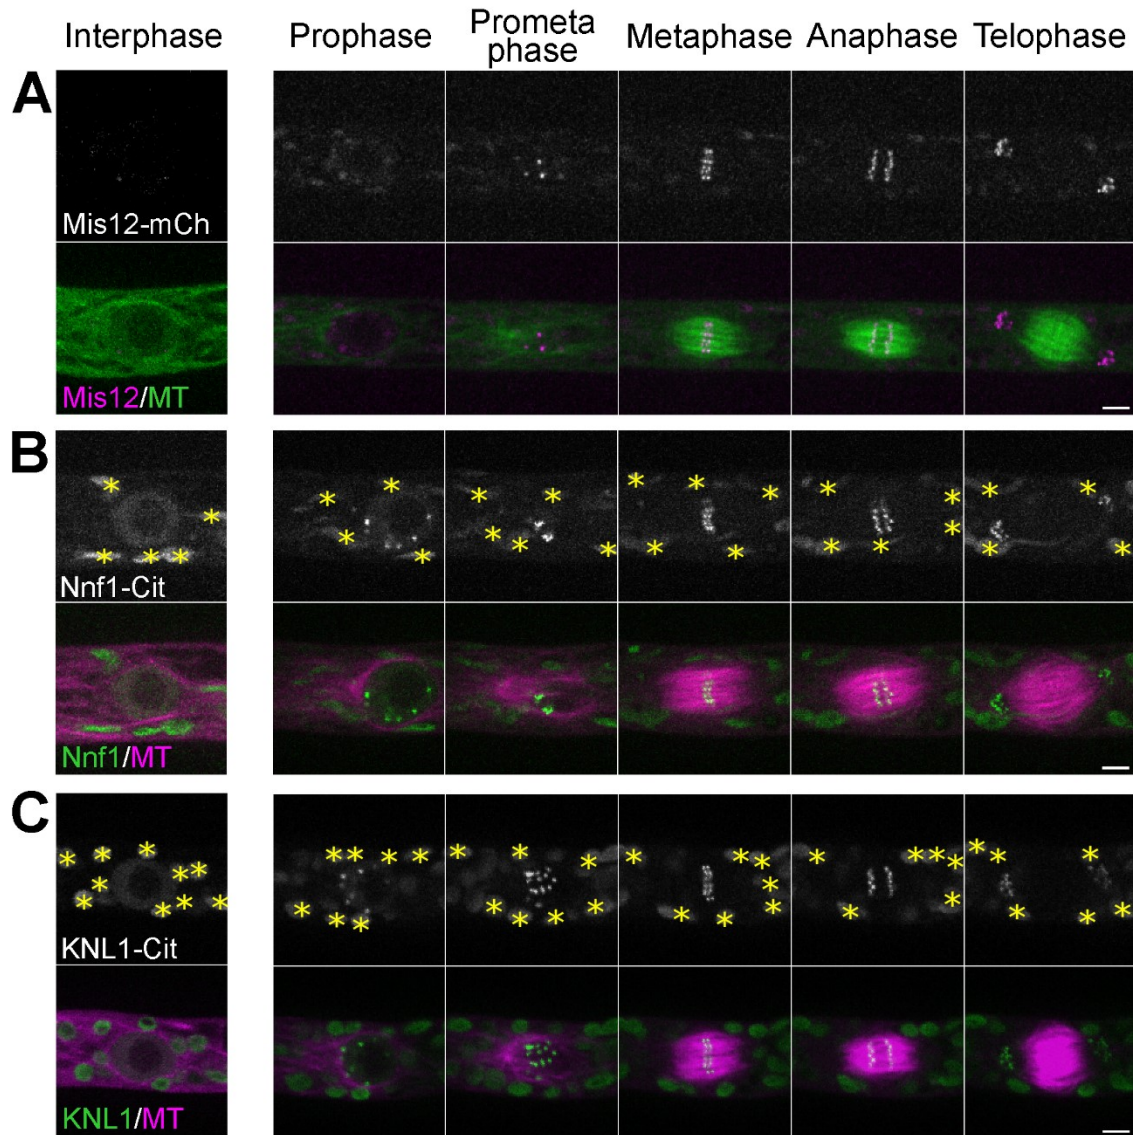

1  
2  
3  
4  
5  
6  
7

**Figure supplement 5. Localization of Mis12, Nnf1 and KNL1 during cell division**

Live imaging of *P. patens* protonemal apical cells expressing GFP-tubulin and Mis12-mCherry (A) or mCherry-tubulin and Nnf1-Citrine(B) or KNL1-Citrine (C) KNL1-Citrine data is an expanded version of Figure 1. Autofluorescent chloroplasts are marked with yellow asterisks. Images were acquired at a single focal plane. Bars, 5  $\mu$ m.

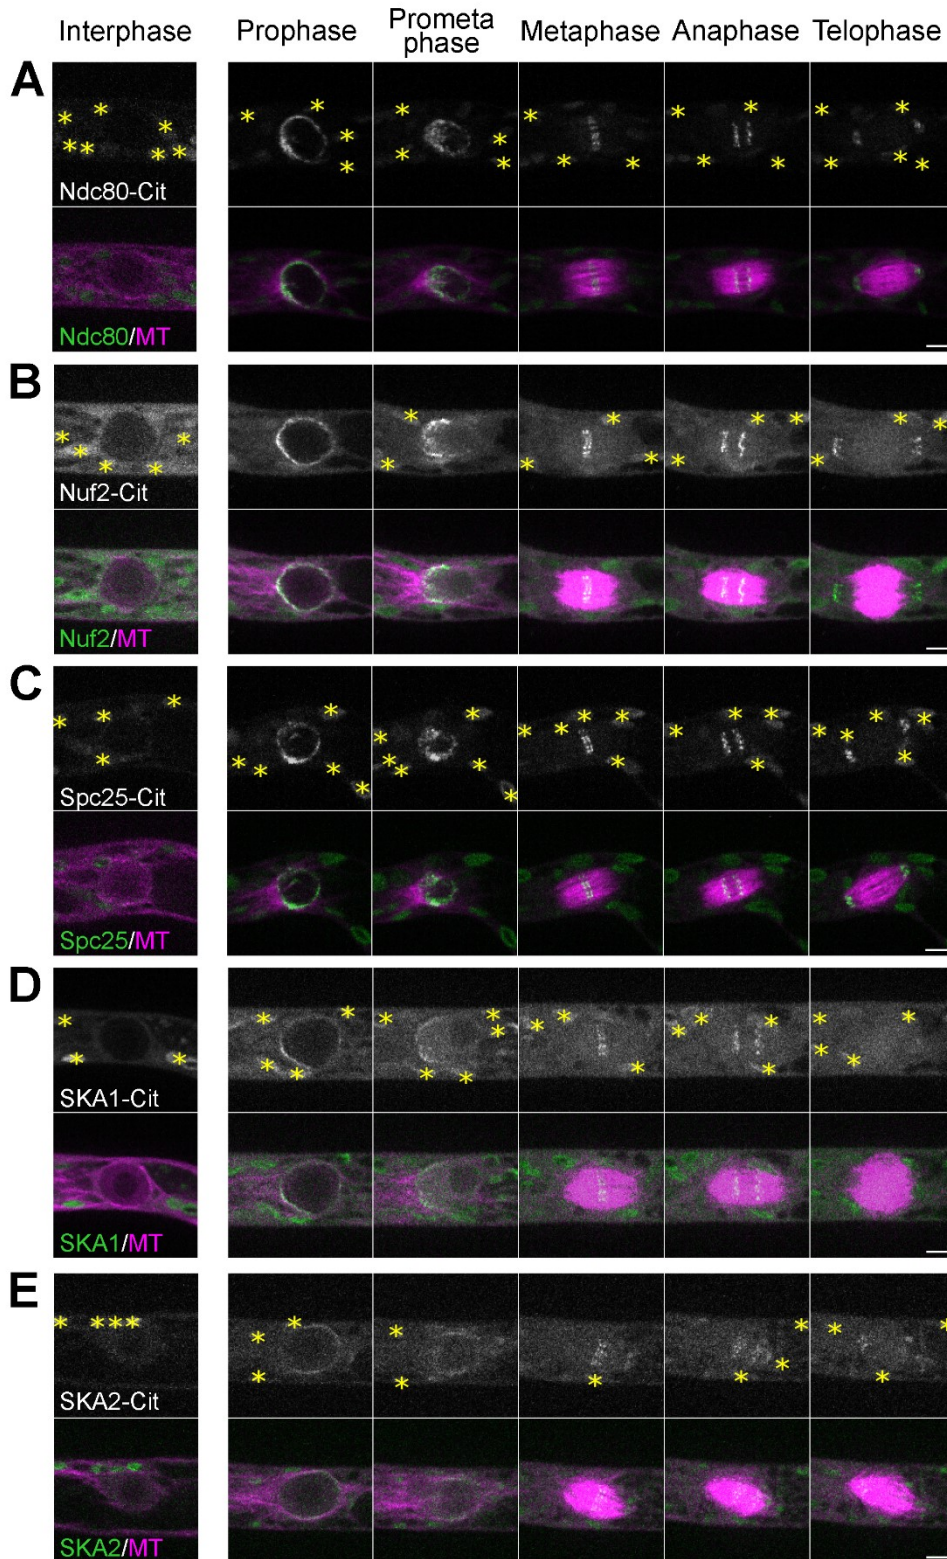

**Figure supplement 6. Localization of outer kinetochore proteins during cell division**

Live imaging in *P. patens* protonemal apical cells expressing mCherry-tubulin (magenta) and Citrine-tagged (green) Ndc80 (A), Nuf2 (B), Spc25 (C), SKA1 (D) and SKA2 (E). Ndc80-Citrine and SKA1-Citrine data are expanded versions of Figure 1. Autofluorescent chloroplasts are marked with yellow asterisks. Images were acquired at a single focal plane. Punctate Citrine signals appeared after prometaphase. Bars, 5  $\mu$ m.

1  
2  
3  
4  
5  
6  
7

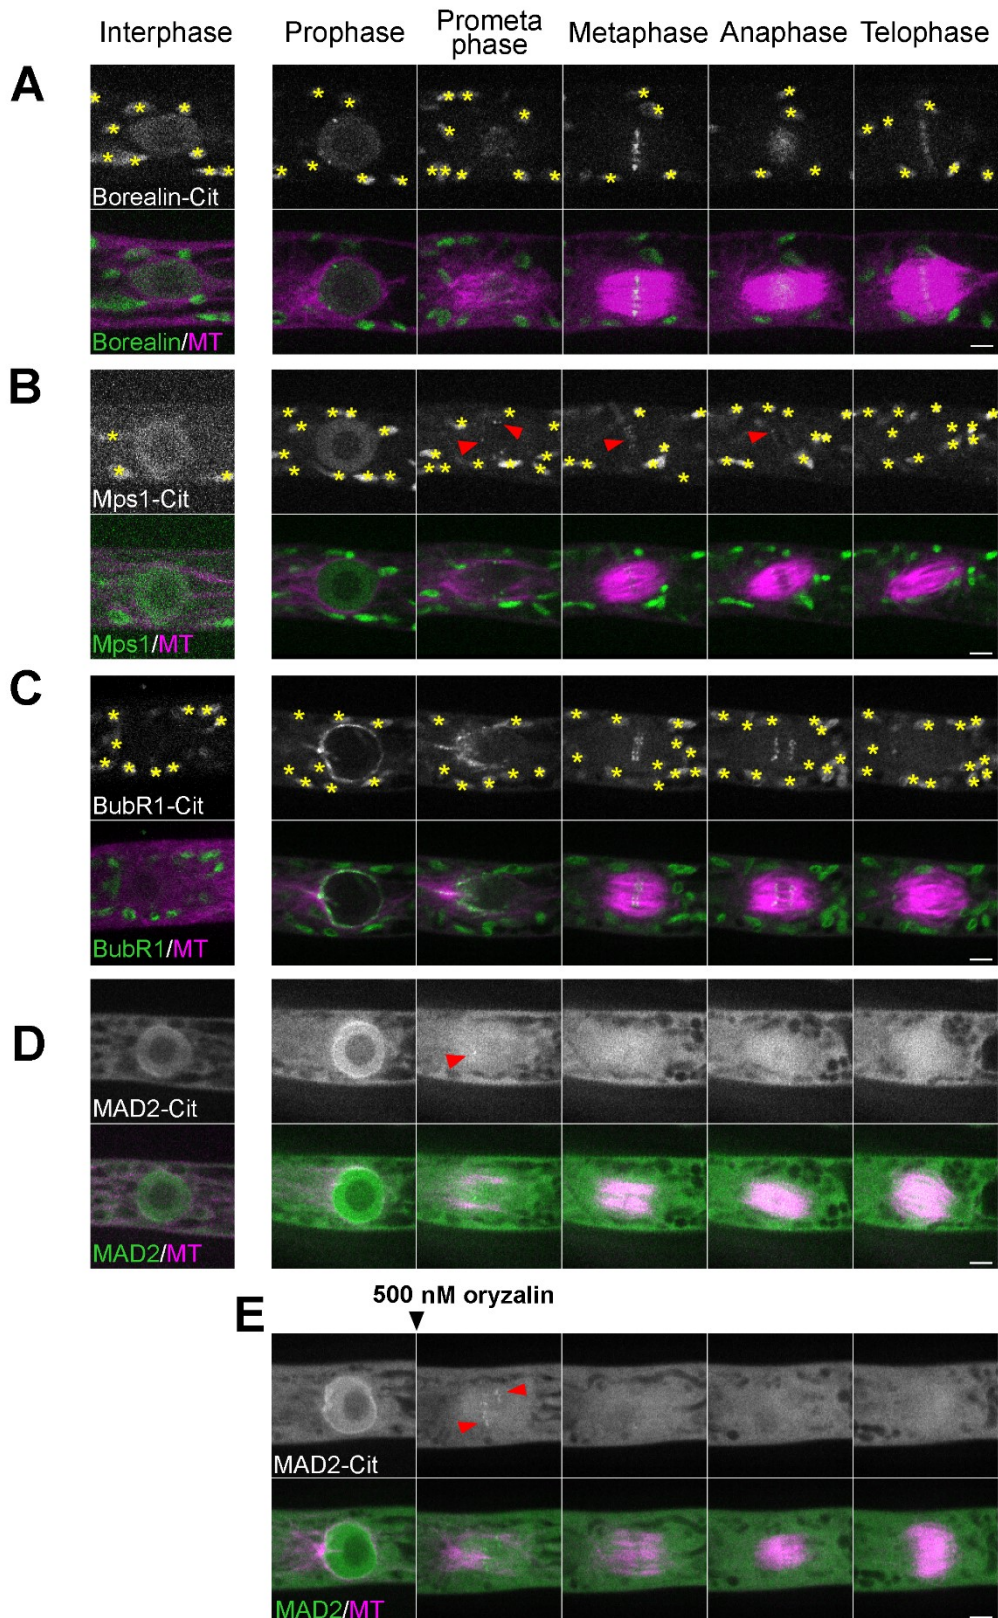

1  
2  
3  
4  
5  
6  
7

### Figure supplement 7. Localization of CPC and SAC proteins during cell division

Live imaging of *P. patens* protonemal apical cells expressing mCherry-tubulin (magenta) and Citrine-tagged (green) Borealin (A), Mps1 (B), BubR1 (C) and Mad2 (D, E). Red arrowheads indicate punctate signals. Note that kinetochore localization of Mad2 was more clearly observed following addition of the microtubule-depolymerizing drug (500 nM oryzalin) (E). Autofluorescent chloroplasts were marked with yellow asterisks. Images were acquired at a single focal plane. Bars, 5  $\mu$ m.

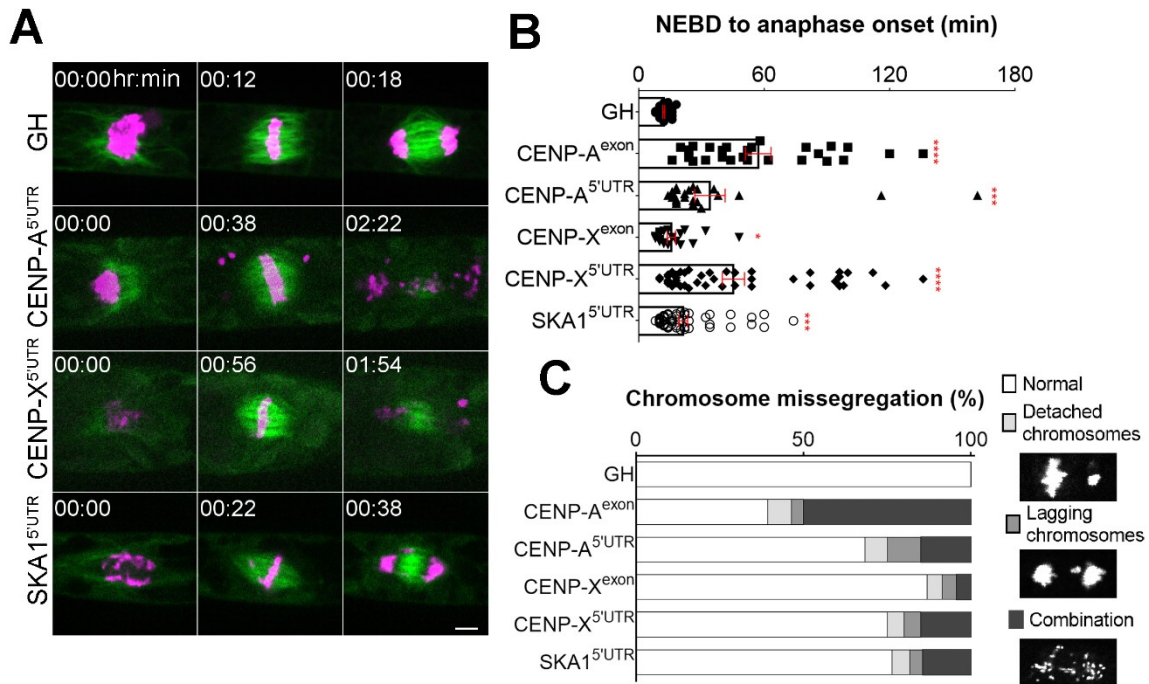

**Figure supplement 8. Chromosome segregation defects following depletion of CENP-A, CENP-X or SKA1**

(A) Representative mitotic progression and chromosome missegregation caused by depletion of CENP-A, CENP-X or SKA1. “GH” is the control line. Bar, 5  $\mu$ m. (B) Duration of mitosis (from NEBD to anaphase onset) was calculated from high-resolution live-cell imaging data for each RNAi line and the control line (GH). Bars indicate mean and SEM, whereas asterisks indicate significant differences compared with the control (\* $P < 0.04$ , \*\*\* $P < 0.0007$ , \*\*\*\* $P < 0.0001$ ; two-tailed  $t$ -test). More than 20 cells were analyzed for each line. (C) Frequency of chromosome missegregation in different RNAi lines. Chromosome missegregation defects were classified into three types: chromosomes detached from the metaphase plate (detached chromosomes), lagging chromosomes in anaphase (lagging chromosomes), and their combination. More than 20 cells were analyzed for each line.

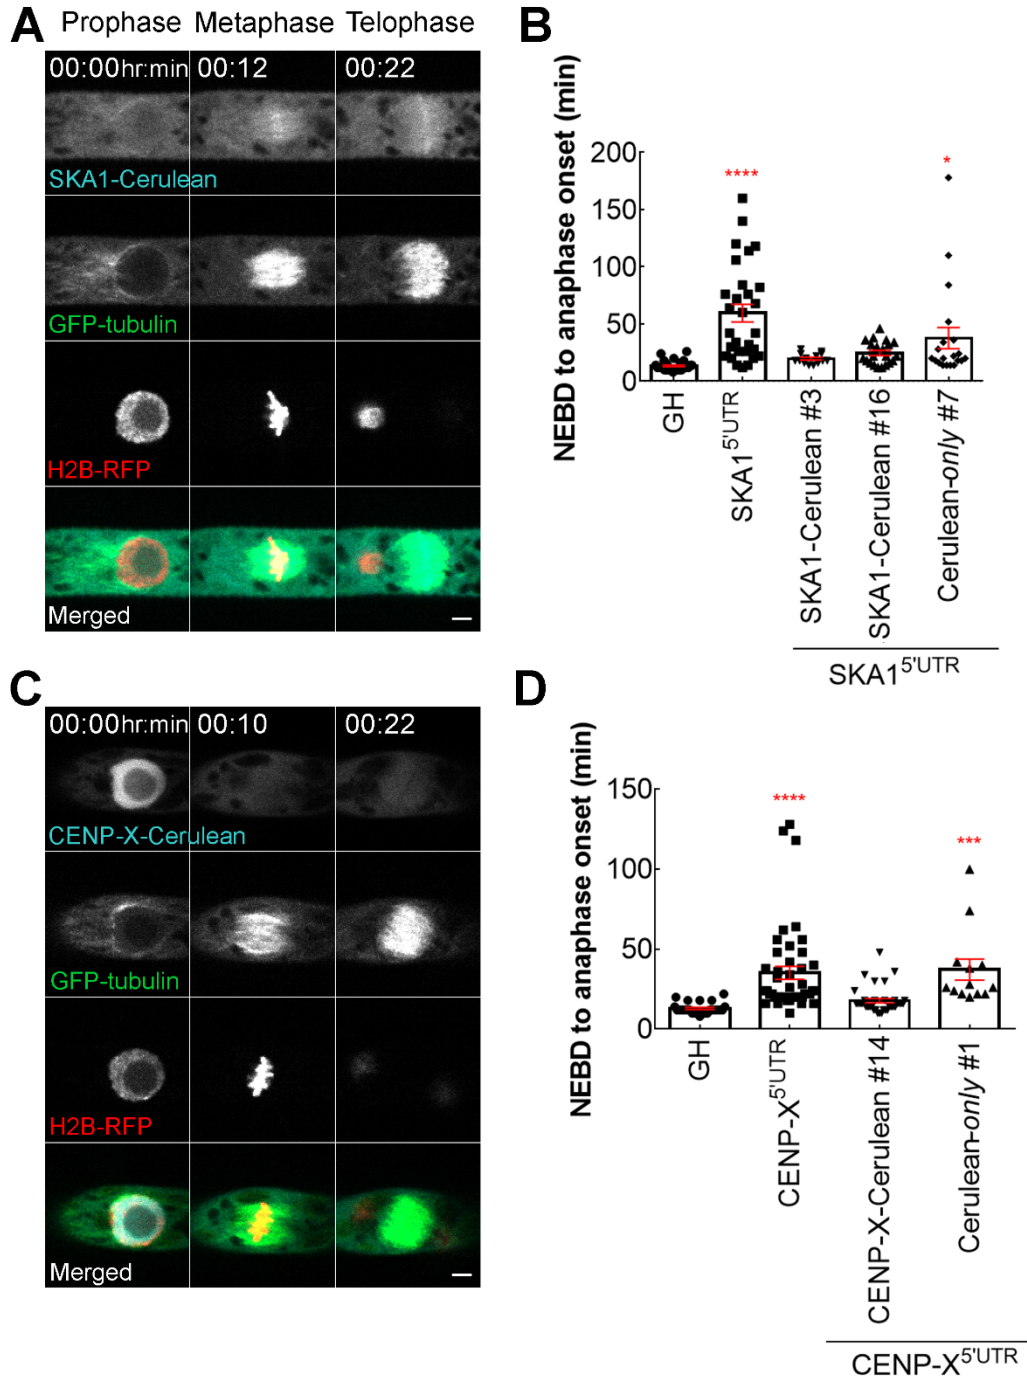

**Figure supplement 9. Rescue of RNAi phenotypes by ectopic expression of SKA1-Cerulean or CENP-X-Cerulean**

Live imaging of *P. patens* protonemal apical cells expressing SKA1-Cerulean (A) or CENP-X-Cerulean (C) in the SKA1 5'UTR RNAi or CENP-X 5'UTR RNAi lines, respectively. RNAi was induced by addition of  $\beta$ -estradiol to the culture medium at the final concentration of 5  $\mu$ M, 5–6 days prior to observation. Bar, 5  $\mu$ m. (B, D) Mitotic duration (from NEBD to anaphase onset) for each RNAi line with or without the rescue construct (two independent SKA1 rescue lines [#3, #16] were analyzed). “GH” is the mother line used for RNAi transformation. Bars indicate mean and SEM, whereas asterisks indicate significant differences (\* $P < 0.03$ , \*\*\* $P < 0.001$ , \*\*\*\* $P < 0.0001$ ; one-way ANOVA). More than ten cells were analyzed for each line.



| <b>CENP-A<sup>exon</sup>; CENP-A<sup>5'UTR</sup></b>          | Cytokinesis defect | Cytokinesis complete |
|---------------------------------------------------------------|--------------------|----------------------|
| Lagging chromosomes observed in the midzone for $\leq 4$ min  | 0                  | 8                    |
| Lagging chromosomes observed in the midzone for $\geq 12$ min | 9                  | 0                    |

| <b>CENP-X<sup>5'UTR</sup></b>                                | Cytokinesis defect | Cytokinesis complete |
|--------------------------------------------------------------|--------------------|----------------------|
| Lagging chromosomes observed in the midzone for $\leq 4$ min | 0                  | 4                    |
| Lagging chromosomes observed in the midzone for $\geq 8$ min | 14                 | 0                    |

| <b>SKA1<sup>5'UTR</sup></b>                                  | Cytokinesis defect | Cytokinesis complete |
|--------------------------------------------------------------|--------------------|----------------------|
| Lagging chromosomes observed in the midzone for $\leq 4$ min | 0                  | 3                    |
| Lagging chromosomes observed in the midzone for $\geq 6$ min | 5                  | 1                    |

**Table supplement 1. Dataset used for Fisher's test in Figure 2C**

1  
2  
3

1 **Video 1. Localization of the centromere and CCAN proteins during cell division**

2 Live-cell imaging was conducted in *P. patens* protonemal cells expressing mCherry-tubulin (magenta) and one  
3 of the following tagged proteins(green): Citrine-CENP-A, KNL2-Citrine, Citrine-CENP-C, Citrine-CENP-O  
4 and Citrine-CENP-S. Note that brightness/contrast of Citrine-CENP-O images have been enhanced. Images are  
5 single focal plane and were acquired every 30 s. Bar, 10  $\mu$ m.

6 **Video 2. Transient disappearance of CENP-C from the kinetochore after cell division**

7 Live-cell imaging was conducted in *P. patens* protonemal cells expressing mCherry-tubulin (magenta) and one  
8 of the following tagged proteins (green): Citrine-CENP-A, Citrine-CENP-C and KNL2-Citrine. Displayed are  
9 the the merged images of a single focal plane for mCherry-tubulin (magenta) and maximum-projection of the Z-  
10 stack for Citrine-tagged proteins. Images were acquired every 5 min. Bar, 10  $\mu$ m.

11 **Video 3. Localization of the C-termini tagged CENP-C and CENP-O**

12 Live-cell imaging was conducted in *P. patens* protonemal cells expressing mCherry-tubulin (magenta) and one  
13 of the following tagged proteins(green):CENP-C-Citrine and CENP-O-Citrine. Images are single focal plane  
14 and were acquired every 30 s. Bar, 10  $\mu$ m.

15  
16 **Video 4. Localization of the Mis12, KNL1, Nuf2 and SKA1 during cell division**

17 Live-cell imaging was conducted in *P. patens* protonemal cells expressing mCherry-tubulin or GFP-tubulin  
18 (magenta) and one of the following tagged proteins: Mis12-mCherry, KNL1-Citrine, Nuf2-Citrine and SKA1-  
19 Citrine Images were acquired at a single focal plane every 30 s. Bar, 10  $\mu$ m.

20 **Video 5. Mitotic defects observed in RNAi lines targeting CENP-C, Nnf1, Nuf2 and KNL1**

21 Representative images of mitotic progression and defects caused by depletion of four kinetochore proteins.  
22 White boxes indicate normal cell division in the control line (GH). White arrowheads show position of  
23 multinucleated cells, yellow arrowheads indicate chromosome missegregation and cytokinesis failure events,  
24 whereas cyan arrowheads show dead cells. RNAi was induced by addition of  $\beta$ -estradiol to the growth medium  
25 at the final concentration of 5  $\mu$ M, 5–6 days prior to observation. Images were acquired at a single focal plane  
26 every 3 min. Bar, 100  $\mu$ m.

27 **Video 6. Chromosome missegregation after RNAi**

28 Representative images of mitotic progression and chromosome missegregation caused by depletion of CENP-A  
29 or CENP-X or SKA1. RNAi was induced by addition of  $\beta$ -estradiol to the growth medium at final concentration  
30 of 5  $\mu$ M, 5–6 days prior to observation. Images were acquired at a single focal plane every 2 min. Bar, 10  $\mu$ m.

31 **Video 7. Cytokinesis defect associated with lagging chromosomes in anaphase**

32 Representative images of correlation between lagging chromosomes and cytokinesis defect in CENP-A exon  
33 RNAi and SKA1 5'UTR RNAi lines. Note that minor lagging chromosomes observed in the midzone for  $\leq 4$   
34 min did not affect cytokinesis (*upper rows*); however lagging chromosomes persistent for  $\geq 6$  min resulted in  
35 cytokinesis failure (*bottom rows*). This correlation is conserved in both CENP-A exon RNAi and SKA1 5'UTR  
36 RNAi lines. Cytokinesis failure was concluded when the nucleus moved without restraint of the cell plate.  
37 RNAi was induced by addition of  $\beta$ -estradiol to the growth medium at final concentration of 5  $\mu$ M, 5–6 days  
38 prior to observation. Images were acquired at a single focal plane every 2 min. Bar, 10  $\mu$ m.

39 **Video 8. Visualization of the cell plate formation using FM4-64 dye**

40 Representative images of cytokinesis in the control GH line (*upper row*), SKA1 5'UTR RNAi line with minor  
41 lagging chromosomes (*middle row*), and with persistent lagging chromosomes (*bottom row*). Cell plate  
42 formation was visualized with 25  $\mu$ M endocytic FM4-64 dye added during metaphase. FM4-64 dye was prone  
43 to photobleaching, and therefore was sometimes supplied multiple times during long-term imaging (*bottom*  
44 *row*). Images were acquired at a single focal plane every 2 min. Bar, 10  $\mu$ m.

45 **Video 9. Mitotic entry of the multi-nucleated cell in *P. patens***

46 SKA1 5'UTR RNAi was induced by addition of  $\beta$ -estradiol to the growth medium at final concentration of 5  
47  $\mu$ M, 5–6 days prior to observation. Multi-nucleated cells resulting from cytokinesis failure were monitored with  
48 the spinning-disk confocal microscope. Images were acquired at a single focal plane every 5 min. Bar, 10  $\mu$ m.

49 **Supplemental dataset 1. *Physcomitrella patens* transgenic lines generated in this study**

50 **Supplemental dataset 2. Plasmids and primers used in this study**

51 **Supplemental dataset 3. Protein alignments used for the phylogeny analysis**
